# Increased levels of circulating neurotoxic metabolites in patients with mild Covid19

**Estibaliz Santiago-Mujika<sup>1</sup>, Kevin Heinrich<sup>2</sup>, Sonia George<sup>1</sup>, Colt D Capan<sup>1</sup>, Cameron Forton<sup>1</sup>, Zachary Madaj<sup>3</sup> Amanda R Burmeister<sup>1</sup>, Matthew Sims<sup>4,5,6</sup>, J Andrew Pospisilik<sup>1</sup>, Patrik Brundin<sup>1</sup>, Stewart F Graham<sup>7,8</sup>, and Lena Brundin<sup>1,9</sup>**

<sup>1</sup> Parkinson's Disease Center, Department of Neurodegenerative Science, Van Andel Institute, Grand Rapids, MI 49503, USA.

<sup>2</sup> Quire Inc., Memphis, TN 38103, USA

<sup>3</sup> Bioinformatics & Biostatistics core, Van Andel Institute, Grand Rapids, MI 49503, USA

<sup>4</sup> Section of Infectious Diseases and International Medicine, Department of Internal Medicine, Beaumont Health, Royal Oak, Michigan 48073, USA

<sup>5</sup> Department of Foundational Medical Studies, Oakland University William Beaumont School of Medicine, Rochester, Michigan, USA.

<sup>6</sup> Department of Internal Medicine, Oakland University William Beaumont School of Medicine, Rochester, Michigan, USA.

<sup>7</sup> Metabolomics Department, Beaumont Research Institute, Beaumont Health, Royal Oak, Michigan 48073, USA.

<sup>8</sup> Oakland University-William Beaumont School of Medicine, Rochester, MI 48309, USA.

<sup>9</sup> Department of Psychiatry, Michigan State University College of Human Medicine, Grand Rapids, MI 49503, USA.

Corresponding author, [Lena.Brundin@vai.org](mailto:Lena.Brundin@vai.org), Van Andel Institute, 333 Bostwick Ave NE, Grand Rapids, MI 49503, USA.

38 **Abstract**

39  
40 SARS-CoV-2 corona virus causes a multi-faceted and poorly defined clinical and  
41 pathological phenotype involving hyperinflammation, cytokine release, and long-term  
42 cognitive deficits, with an undefined neuropathological mechanism. Inflammation  
43 increases the activity of the kynurenine pathway, which is linked to neurodegenerative  
44 and psychiatric disorders. We sought to determine whether the kynurenine pathway is  
45 impacted in patients with mild COVID-19, leading to elevated neurotoxic metabolites in  
46 blood, and whether such changes are associated with pro-inflammatory cytokines. Serum  
47 samples were taken from 150 patients and analyzed by ELISA and ultra-high  
48 performance liquid chromatography (UHPLC). The data were analyzed using multiple  
49 linear regression models adjusted for age and sex. We found increased levels of  
50 kynurenine, quinolinic acid and 3-hydroxykynurenine in serum from patients with mild  
51 COVID-19, together with increased levels of IL-6, ICAM-1, VCAM-1 and neopterin. The  
52 levels of neurotoxic metabolites were significantly associated with key inflammatory  
53 cytokines including IL-6 and TNF $\alpha$ . The COVID-19 risk-factor hypertension was  
54 associated with the highest levels of neurotoxic metabolites in plasma. These neuroactive  
55 metabolites could be part of the pathological mechanisms underlying cognitive  
56 impairment during and post-COVID and should be explored as potential biomarkers for  
57 long-COVID symptoms.

58

59 **Keywords:** Mild COVID-19, Tryptophan metabolism, 3-HK, quinolinic acid

## 60 **Introduction**

61 COVID-19, caused by SARS-CoV-2, can lead to systemic disease, including pneumonia,  
62 acute respiratory distress syndrome, and impaired consciousness (1). COVID-19 also  
63 leads to an activation of innate and adaptive immune responses which result in a  
64 substantial inflammatory response (2). In a certain percentage of patients, symptoms  
65 persist over time with the potential of symptoms lasting months and up to years after initial  
66 illness. In these patients, there is a predominance for those effected by the illness to  
67 present neuropsychiatric symptoms (3). Recent studies have shown an increased risk for  
68 acute and long-term sequelae after COVID-19 in both vaccinated and unvaccinated  
69 patients (4). However, there is currently a lack of understanding for the factors that drive  
70 the neuropsychiatric symptoms present during acute and long-term COVID-19. Thus,  
71 there is an urgent need to identify biomarkers that can indicate the disease progression  
72 during long-COVID, as well as contribute to the understanding of its underlying pathology.

73  
74 The kynurenine pathway is the major route for tryptophan (TRP) metabolism, and it  
75 contributes to several fundamental biological processes, all converging in energy  
76 metabolism. Infections and inflammatory conditions can alter the activity of the enzymes  
77 in this pathway (5). Several neuroactive metabolites of the kynurenine pathway that bind  
78 neuronal receptors have an underlying role in both neurological and psychiatric symptoms  
79 (5). As such, quinolinic acid (QUIN) is an agonist of the glutamatergic *N*-methyl-D-  
80 aspartate (NMDA) receptor and kynurenic acid (KYNA) is an antagonist of the same  
81 receptor (6). In high concentrations, QUIN induces excitotoxic neuronal death by allowing  
82 excessive amounts of calcium to enter the cell (6). While KYNA blocks the cholinergic  $\alpha 7$

83 nicotinic receptor, it also antagonizes the glycine site of the NMDA-receptor, thus  
84 preventing calcium influx (7, 8).

85

86 Another kynurenine pathway metabolite, 3-hydroxykynurenine (3-HK) is also neurotoxic  
87 and pro-inflammatory (9). 3-HK promotes reactive oxygen species (ROS) generation  
88 through several oxidative conversions (10), and 3-HK can accelerate endothelial cell  
89 apoptosis (11). The neurotoxic effects of QUIN and 3-HK are additive (5). Entry of QUIN  
90 and KYNA into the central nervous system (CNS) is likely partially prohibited by an intact  
91 blood brain barrier (BBB). KYN (the metabolite produced from TRP metabolism) and 3-  
92 HK, can freely pass the BBB (12). Within the brain, KYN is metabolized to KYNA by  
93 astrocytes (5, 13), or to 3-HK and then further to QUIN by microglia and macrophages (5,  
94 14). SARS-CoV-2 infection is known to affect the KYN levels by inducing the production  
95 of the pro-inflammatory cytokine, interferon-gamma (IFN- $\gamma$ ) that stimulates the rate-  
96 limiting enzyme in the kynurenine pathway, indoleamine-2,3-dioxygenase (IDO), thus  
97 affecting KYN levels (15).

98 As previously mentioned, SARS-CoV-2 can lead to a substantial inflammatory response,  
99 which affects the levels of different metabolites from the kynurenine pathway. However,  
100 there are also other proteins involved in the inflammatory response, such as the  
101 intercellular cell adhesion molecule-1 (ICAM-1) and the vascular cell adhesion protein-1  
102 (VCAM-1), in which we were interested. Both ICAM-1 and VCAM-1 are cell surface  
103 glycoproteins that govern immune cell migration to sites of inflammation and T-cell-  
104 mediated immunity in tissues (16-18). They are expressed in vascular endothelial cells  
105 and in response to inflammation, their expression is induced in epithelial and immune

106 cells (19, 20). ICAM-1 and VCAM-1 play a central role in leukocyte trafficking, lymphocyte  
107 activation and several immune responses, and the upregulation of ICAM-1 is a signature  
108 event during inflammation (21). A recent study showed that monocyte-derived  
109 macrophages drive the inflammatory response to SARS-CoV-2 and long-term changes  
110 in inflammatory response of monocytes can be detected in convalescent SARS-CoV-2  
111 patients following mild infection (22). Therefore, it is of interest to determine whether the  
112 levels of ICAM-1 and VCAM-1 are affected in patients with mild COVID-19, and whether  
113 they are linked to kynurenine pathway activation.

114 In the current study, we analyzed serum samples from 150 patients, 44 of whom tested  
115 positive for COVID-19 but exhibited mild disease and were non-hospitalized. We sought  
116 to determine whether the production of neuroactive and neurotoxic metabolites along the  
117 kynurenine pathway, as well as several proteins involved in inflammation, is altered in  
118 patients with mild COVID-19, as this could be associated to the underlying  
119 neuropsychiatry symptoms. Kynurenine pathway metabolites are correlated with the  
120 severity and predicted negative outcomes of symptoms in COVID-19 patients; and could  
121 potentially serve as biomarkers or predictors of neuropsychiatric long-covid symptoms.

122

123 **Results**

124

125 ***Demographics of study participants***

126 Serum samples were taken from 150 individuals, 44 were diagnosed with mild COVID-19  
127 (defined for this purpose as positive, but not requiring hospitalization or treatment) and  
128 106 were controls who tested negative for COVID-19. Demographics of study participants  
129 are shown in **Table 1**. The average age of SARS-CoV-2 positive individuals was  $44.2 \pm$   
130  $13.1$  years and controls were  $45.6 \pm 13.4$  years. 47 females (44.3%) were included as  
131 controls and 25 females (56.8%) were enrolled with mild COVID-19. Of all participants, 8  
132 controls (7.5%) and 7 COVID +ve (15.9%) were Asian, 5 controls (4.7%) and 0 COVID  
133 +ve (0%) were Black/African, 84 controls (79.2%) and 35 COVID +ve (79.5%) were  
134 White/Caucasian, 4 controls (3.8%) and 2 COVID +ve (4.5%) were Other, and 5 control  
135 (4.7%) and 0 COVID +ve (0%) opted to not answer.

136 ***Higher levels of IL-6 present in patients with mild COVID-19***

137 Individuals with mild COVID-19 demonstrated significantly higher levels of IL-6 when  
138 compared to negative controls (ANOVA F: 5.260,  $p= 0.0028^{**}$ ) (**Figure 1a**). TNF- $\alpha$  levels  
139 were not altered when both groups were compared (ANOVA F: 2.347,  $p= 0.075$  ns)  
140 (**Figure 1b**). No significant differences were observed for the other inflammatory markers  
141 including IL-13 (F: 1.847,  $p= 0.141$  ns), IL-8 (F: 1.223,  $p= 0.304$  ns), IFN- $\gamma$  (F: 2.054,  $p=$   
142  $0.109$  ns, data not shown). All data was corrected for age and sex.

143

144 ***Higher levels of several proteins related to inflammation present in patients with***  
145 ***mild COVID-19***

146 The level of ICAM-1 was increased in patients who tested positive for COVID-19 when  
147 compared to the ones that did not (data corrected for sex and age, ANOVA test F: 5.823,  
148  $p < 0.001$  \*\*\*) (**Figure 2a**). Similarly, patients positive for COVID-19 also showed increased  
149 levels of VCAM-1 when compared to the PCR-negative patients (data adjusted for sex  
150 and age, ANOVA F: 3.307,  $p = 0.022$  \*). The inflammatory related protein, neopterin was  
151 also increased in COVID-19 positive patients (data adjusted for age and sex, ANOVA test  
152 F: 3.309,  $p = 0.022$  \*) (**Figure 2b and 2c**)

153 ***Metabolites of the kynurenine pathway are increased in patients with mild COVID-***  
154 ***19***

155 Previous research demonstrated alterations in kynurenine pathway activity following  
156 infection (23-25). Therefore, we investigated alterations in kynurenine pathway  
157 metabolite levels. Kynurenine (KYN), the first metabolite of the pathway, was significantly  
158 increased in patients with mild COVID-19 when compared to patients who tested negative  
159 for SARS-CoV-2 (ANOVA test F: 11.195,  $p = 0 < 0.001$  \*\*\*, **Figure 3**). Additionally, 3-HK  
160 and QUIN, were increased in patients who tested positive for COVID-19 when compared  
161 to patients who did not (ANOVA test F: 3.990,  $p = 0.009$  \*\*; F: 8.492,  $p < 0.001$  \*\*\*,  
162 respectively, **Figure 3**). Further, picolinic acid (PIC) levels in COVID-19 positive patients  
163 were significantly decreased when compared to COVID negative patients (ANOVA test  
164 F: 4.399,  $p = 0.005$  \*\*). Finally, anthranilic acid (AA) was also significantly increased in  
165 patients with mild COVID-19 when compared to the patients who tested negative for the

166 virus (ANOVA test F: 4.024,  $p= 0.009$  \*\*, **Figure 2d**). All data was corrected for age and  
167 sex.

168 The ratio of several metabolites was used to further investigate the induction of the  
169 kynurenine pathway. The KYN/TRP ratio was quantified to determine the induction of the  
170 kynurenine pathway. When both groups were compared, COVID-19 patients showed  
171 significantly increased levels of the induction of the kynurenine pathway (ANOVA test F:  
172 6.377,  $p< 0.001$  \*\*\*, **Figure 3**). The QUIN/TRP ratio, which has been previously identified  
173 as a biomarker for neurological diseases (26), was also analyzed. COVID-19 positive  
174 cases showed a statistically significant increase in this ratio when compared to the non-  
175 COVID-19 patients (ANOVA test F: 5.837,  $p<0.001$  \*\*\*, **Figure 3**). Another neurotoxic  
176 ratio that was measured was QUIN/KYNA. In this study, COVID-19 positive patients  
177 presented significantly higher ratios when compared to the control group (ANOVA test F:  
178 2.847,  $p= 0.040$  \*, **Figure 3**). All data was corrected for age and sex.

### 179 ***Correlation between neurotoxic metabolites of the kynurenine pathway and pro-*** 180 ***inflammatory cytokines***

181 Previous research has shown the relationship between inflammation and the kynurenine  
182 pathway activity. Therefore, we subsequently investigated whether the levels of  
183 kynurenine metabolites and inflammatory cytokines were correlated. As shown in **Figure**  
184 **4**, there was a positive correlation between the levels of TNF- $\alpha$  and KYN (Pearson  
185 correlation: 0.453;  $p=0.002$ \*\*), 3-HK (Pearson correlation: 0.527;  $p<0.001$ \*\*\*) and QUIN  
186 (Pearson correlation: 0.482;  $p<0.001$ \*\*\*). Furthermore, a positive correlation between IL-  
187 6 and both 3-HK (Pearson correlation: 0.328;  $p=0.03$ \*) and QUIN (data adjusted for age



188 and sex, Pearson correlation: 0.418;  $p=0.005^{**}$ ) was also found. All data was corrected  
189 for age and sex.

190 ***Increased levels of neurotoxic metabolites in COVID-19 patients with hypertension***

191

192 We then analyzed patients who presented with hypertension, a well-known risk factor for  
193 severe COVID-19, and compared them with the patients that were not hypertensive in  
194 both COVID-19 positive and negative patients. Regression analysis adjusted for age and  
195 sex revealed that COVID-19 hypertensive patients presented evidence of higher levels  
196 when compared to non-hypertensive COVID-19 patients in the following proteins: IL-2  
197 (fold change 2.66,  $p=0.003^{**}$ ), IL-6 (fold change 1.45,  $p\text{-value}=0.014^*$ ), TNF- $\alpha$  (fold  
198 change 1.38,  $p=0.012^*$ ), 3-HK (fold change 1.26,  $p=0.08$ ), and the QUIN/TRP ratio (fold  
199 change 1.14,  $p = 0.089$ ) (**Figure 5**).

200

201

202

203

204 **Discussion**

205  
206 In the current study, we investigated the inflammatory and kynurenine pathway metabolite  
207 signatures between mild COVID-19 cases and controls. We found increases in several  
208 kynurenine pathway metabolites, such as KYN, QUIN, 3-HK and PIC, together with higher  
209 levels of IL-6. Additionally, the increased levels in QUIN/TRP, QUIN/KYN, QUIN/KYNA  
210 and KYN/TRP, further support a recent published study by Cihan and colleagues (23).  
211 Pro-inflammatory pathway proteins, along with metabolites from the kynurenine pathway  
212 were significantly increased in patients that presented with both COVID-19 and  
213 hypertension when compared to COVID-19 patients that were not hypertensive. Those  
214 proteins included IL-2, IL-6, TNF $\alpha$ , ICAM-1, VCAM-1, 3-HK, QUIN, QUIN:TRP and  
215 KYN:TRP.

216  
217 Kynurenine pathway metabolites are correlated with severity and predicted negative  
218 outcomes of symptoms in COVID-19 patients; therefore, it is important to understand the  
219 role of kynurenine metabolites in mild COVID-19 patients and long-haulers, in particular  
220 those with neuropsychiatric symptoms (15). In this study, we found the levels of ICAM-1  
221 and VCAM-1 to be significantly increased in patients with mild SARS-CoV-2, in particular  
222 those with hypertension. Increased levels of ICAM-1 and VCAM-1 in mild and severe  
223 cases of COVID-19 infection has already been reported in a small study (27), where it  
224 was observed that the severity of COVID-19 disease was associated with increased  
225 levels of ICAM-1 and VCAM-1. The main caveat with that study was the small number of  
226 patients analyzed. Our new findings support the prior observations and link increases in  
227 endothelial cell adhesion molecules to kynurenine pathway metabolites, such as IDO.

228 IDO is expressed in endothelial cells of vessel walls, and under pathological states, a  
229 decrease in IDO leads to an increase in VCAM-1 (28). Therefore, understanding how the  
230 kynurenine pathway is involved in inflammatory diseases and how it can alter the levels  
231 of ICAM-1 and VCAM-1 will be important to understand, especially in the context of  
232 COVID-19.

233  
234 Lionetto et al., measured the levels of KYN and TRP in the serum of healthy patients,  
235 SARS-CoV-2 negative patients, and SARS-CoV-2 positive patients (29). In SARS-CoV-2  
236 positive patients, the KYN/TRP ratio was higher when compared to the negative and the  
237 healthy controls (29). We also found an increase in the KYN/TRP ratio in SARS-CoV-2  
238 positive patients when compared to those who tested negative. The KYN/TRP ratio is  
239 usually used as an indirect measure of the activity of the IDO enzyme (30); which  
240 catalyzes tryptophan. Previous research has demonstrated that IDO is regulated by IFN-  
241  $\gamma$  (31, 32). We observed no differences in the levels of serum IFN- $\gamma$  in mild COVID-19  
242 samples. However, IDO activation and gene expression has also been shown to be  
243 altered by noncanonical pathways in addition to IFN- $\gamma$  (33). This potentially explains the  
244 increased kynurenine pathway activation that we observed in our cohort. The activation  
245 of the kynurenine pathway may cause long-lasting inflammation rather than the acute  
246 inflammation observed early in COVID-19. Therefore, it will be of interest to follow the  
247 kynurenine metabolites as markers in patients with symptoms of long-COVID.

248  
249 Together with the KYN/TRP ratio, the QUIN/TRP ratio was increased in patients with  
250 COVID-19 when compared to controls. In a previous study, Drewes and colleagues

251 suggest that cerebrospinal fluid (CSF) QUIN/TRP ratio could be an early, predictive  
252 marker of CNS disease (26). In simian-immunodeficient virus (SIV)-infected macaques,  
253 the ratio of QUIN/TRP was significantly increased in cases that led to severe encephalitis  
254 (26). Encephalitis is one of the many potential consequences of COVID-19 patients (34);  
255 and the QUIN/TRP ratio could be used to determine the outcome of patients. Our data  
256 show a significant increase in this ratio in COVID-19 patients, when compared to those  
257 that tested negative for the virus. We also found that the ratio between QUIN/TRP was  
258 also increased in hypertensive COVID-19 patients, suggesting that patients with  
259 hypertension might be prone to a worse outcome.

260

261 Cihan and colleagues analyzed kynurenine pathway metabolites and inflammatory  
262 cytokines and found a positive correlation between IL-6 and various metabolites from the  
263 kynurenine pathway (23). Our study supports a positive correlation between IL-6 and  
264 QUIN as well as between IL-6 and 3-HK. Since Cihan's study analyzed severe and ICU  
265 cases of COVID-19 patients, it is possible that the lack of correlation between IL-6 and  
266 other kynurenine metabolites in our study is because only mild COVID-19 cases were  
267 analyzed. The correlation of IL-6 and kynurenine metabolites could also potentially be  
268 used as a biomarker of disease severity.

269

270 The correlation between IL-6, IFN- $\gamma$ , and TNF- $\alpha$  and kynurenine metabolites supports the  
271 link between inflammation, SARS-CoV-2 and the kynurenine pathway. We found a  
272 positive correlation between TNF- $\alpha$  and three metabolites: 3-HK, KYN, and QUIN. TNF-  
273  $\alpha$  affects the kynurenine pathway in patients with schizophrenia, as a positive correlation

274 between the levels of TNF- $\alpha$  and KYN has been reported (35). TNF- $\alpha$  may accelerate the  
275 formation of KYN from the catabolism of TRP (35). We did not observe differences in  
276 TNF- $\alpha$  levels between negative and positive SARS-CoV-2 patients, however, we did find  
277 a correlation between TNF- $\alpha$  and KYN levels, similar to what has been reported for  
278 schizophrenia (35). In this study, QUIN, 3-HK and KYN were significantly increased in  
279 patients with mild COVID-19. Both QUIN and 3-HK are neurotoxic metabolites and were  
280 positively correlated with TNF- $\alpha$  and IL-6 in the case of QUIN, and TNF- $\alpha$  in the case of  
281 3-HK, it is possible that the inflammation observed in COVID-19 patients further  
282 contributes to the neuronal damage caused by the neurotoxic metabolites.

283 To summarize, we found an increase in neurotoxic metabolites of the kynurenine pathway  
284 in patients with mild COVID-19. Furthermore, the neurotoxic metabolites were correlated  
285 with inflammatory markers and vascular injury markers, such as TNF- $\alpha$ , IL-6, VCAM-1  
286 and ICAM-1. We hypothesize that the activation of the neurotoxic branch of the  
287 kynurenine pathway might contribute to neurological, cognitive, and psychiatric  
288 symptoms experienced in COVID-19 and its aftermath. We suggest that these  
289 metabolites should be studied further for their potential as biomarkers of long COVID and  
290 as potential contributors to the disease mechanisms underlying long COVID.

291

292

293

294

295

296

297 **Materials and Methods**

298

299 *Blood samples*

300 Blood was drawn by venipuncture of the right or left antecubital vein. Blood was allowed  
301 to clot at room temperature prior to centrifugation. Serum was aliquoted into cryovials and  
302 immediately transferred to -80°C for storage until biological assays.

303

304 *Detection of tryptophan, serotonin, and kynurenine metabolites*

305 Serum samples were mixed with extraction solution, briefly vortexed and centrifuged. The  
306 supernatant, which contains the metabolites of interest was removed and dried under  
307 reduced pressure conditions for ninety minutes in a GeneVac EZ-2 Plus speedvac (SP  
308 Scientific, Warminster,PA). Dried down extracts were then resuspended in 0.1% formic  
309 acid in Milli-Q water, once resuspended samples were centrifuged through a COSTAR  
310 Spin-X 0.22-um filter tube and transferred to an amber vial containing a glass insert.

311

312 *Quantification of kynurenine metabolites*

313 Kynurenine pathway metabolites (KYN, KYNA, 3-HK, QUIN, PIC, NTA, NIC, AA), TRP  
314 and serotonin were quantified using reverse phase ultra-high-performance liquid  
315 chromatography (UHPLC) coupled to a triple quadrupole mass spectrometer (1290  
316 Infinity II LC System, 6470 Triple quadrupole, Agilent Technologies, Santa Clara, CA).  
317 Five-microliters of samples were injected onto a Vanguard HSS T3 Pre-column that was  
318 connected to an Acquity HSS T3 analytical column. Elution conditions used a combination  
319 of Solvent A (0.1% formic acid in LC/MS grade Water) and Solvent B (0.1% formic acid

320 in 90% LC/MS grade acetonitrile) at a flow rate of 0.4mL/min. Agilent Masshunter  
321 Quantitative Analysis Software (v9.0, Agilent) was used to analyze and export data.  
322 Intra-assay coefficients of variability (CV) for plasma analytes: TRP 4.1%, KYN 2.5%,  
323 KYNA 1.6%, 3-HK 5.0%, QUIN 2.8%, PIC 3.3%, NTA 1.6%, NIC 5.4%, AA 8.4% and 5-  
324 HT 2.2%.  
325 Inter-assay CVs: TRP 4.8%, KYN 1.8%, KYNA 1.5%, 3-HK 4.9%, QUIN 1.8%, PIC 1.9%,  
326 NTA 1.8%, NIC 6.5%, AA 7.2% and 5-HT 4.9%.  
327 Lower limits of detection (LLOD) were found to be as follows: TRP 36.6 nM, KYN 2.2 nM,  
328 KYNA 0.16 nM, 3-HK 0.29 nM, QUIN 4.15 nM, PIC 0.63 nM, NTA 0.98 nM, NIC 0.07 nM,  
329 AA 0.98 nM and 5-HT 0.73 nM.

330

### 331 *Quantification of cytokines and alpha-synuclein*

332 Three Meso Scale Discovery (MSD) multiplex kits (Meso Scale Diagnostics LLC,  
333 Rockville, MD) were read using a MESO QuickPlex SQ 120 plate reader. Samples were  
334 run in duplicate according to the manufacturer's instructions and sample concentrations  
335 were generated through MSD Discovery Workbench 4.0 software. Samples below the  
336 average LLOD were denoted as the average LLOD across plates. For  $\alpha$ -synuclein, the  
337 U-PLEX human  $\alpha$ -synuclein kit was used. Samples were diluted 1:8 with sample diluent  
338 and generated an inter-plate CV of 3%, an average intra-assay CV of 5.2%, and the LLOD  
339 of 0.876 pg/mL.

340

341 Using the MSD V-PLEX human vascular injury II kit, we quantified C-reactive protein  
342 (CRP), serum amyloid A (SAA), ICAM-1, and VCAM-1. Samples were diluted 1:1000 with

343 manufacturer's diluent reagent. The inter-plate CV was 10.3% (CRP: 8.3%, SAA: 9.7%,  
344 ICAM-1: 15.2%, VCAM-1: 8.1 %), average intra-assay CV 5.6% (CRP 4.2%, SAA 6.5%,  
345 ICAM-1 6.6%, and VCAM-1 5.2%), the LLOD were 1.077pg/mL CRP, 12.839 pg/mL SAA,  
346 1.037 pg/mL ICAM-1, and 6.618 pg/mL VCAM-1.

347

348 The MSD V-PLEX human proinflammatory I kit was used to determine the level of IFN- $\gamma$ ,  
349 interleukin (IL)-10, IL-12p70, IL-13, IL-1 $\beta$ , IL-2, IL-4, IL-6, IL-8, and tumor necrosis factor  
350 alpha (TNF- $\alpha$ ). Samples were diluted 1:1 with sample diluent. Inter-plate CV were  
351 calculated (**see Supplementary Table 1**), and the LLOD was IFN- $\gamma$ : 0.087 pg/mL, IL-10:  
352 0.025 pg/mL, IL-12p70: 0.0385 pg/mL, IL-13: 0.209 pg/mL, IL-1 $\beta$ : 0.032 pg/mL, IL-2:  
353 0.024 pg/mL, IL-4: 0.004 pg/mL, IL-6: 0.045 pg/mL, IL-8: 0.017 pg/mL, and TNF- $\alpha$ : 0.049  
354 pg/mL.

355

### 356 *Quantification of Neopterin and S100B*

357 Neopterin ELISA kits were purchased from IBL America (Immuno-Biological Laboratories  
358 Inc., Minneapolis, MN). Undiluted serum samples were used following the manufacturer's  
359 protocol. S100B ELISA kits were purchased from Millipore (EMD Millipore, St. Louis, MO)  
360 and samples were diluted 1:1. Plates were read using a Tecan Infinite M200 Pro plate  
361 reader (Tecan Group Ltd, Männedorf, Switzerland). Sample concentrations were  
362 generated using a 4 Parameter Logistic Curve Calculator (AAT Bioquest, "Quest Graph  
363 Four Parameter Logistic (4PL) Curve Calculator" 15 Jul. 2021,  
364 [https://www.aatbio.com/tools/four-parameter-logistic-4pl-curve-regression-online-  
calculator](https://www.aatbio.com/tools/four-parameter-logistic-4pl-curve-regression-online-calculator)). The average inter-plate CV for Neopterin was 12.1%, the average intra-assay



366 CV was 2.2%, and the LLOD given by the manufacturer is 0.177 ng/mL. For S100B the  
367 average inter-plate CV was 5.0%, the average intra-assay CV was 1.9%, and the LLOD  
368 was 2.7 pg/mL as specified by the manufacturer.

369

### 370 *Statistical analysis*

371 Models were adjusted for age and sex in all instances. Robust linear regressions to  
372 assess differences between PCR+ individuals with and without hypertension were  
373 analyzed via R v 4.1.0 (<https://cran.r-project.org/>). Correlation analyses and ANOVAs  
374 were done with SPSS Statistics (version 28.0.1.0). Graphs were generated using  
375 GraphPad Prism version 9.0374 (GraphPad Software, La Jolla, CA). For all tests,  
376 statistical significance was considered as  $p < 0.05$  and weak evidence as  $0.05 < p < 0.1$ .

377

### 378 *Study approval*

379 This study utilized a subset of samples from the Beaumont Health Large-Scale  
380 Automated Serologic Testing for COVID-19 study (36) and was approved by the  
381 Institutional Review Board (IRB) at the Beaumont Research Institute Detroit, Michigan,  
382 USA (2021-110). The final cohort consisted of 150 individuals (44 Mild COVID-19 cases  
383 and 106 controls) randomly selected from the registry. Individuals testing positive for  
384 SARS-CoV-2 in a qPCR test at the time of sampling were assigned “Covid19 positive”  
385 whereas individuals testing negative in a qPCR test for C SARS-CoV-2 at the time of  
386 blood sample were assigned “Covid19 negative” for the purpose of this study.

387

388

389

390 **Author Contributions**

391 Conceptualization, LB SFG, PB; data curation, ESM, ARB, CDC, CF, KH; formal analysis,  
392 ESM, LB, SFG, PB, regression analysis with R, ZM; methodology, LB; visualization, ESM,  
393 ARB; writing—original draft, ESM, ARB; writing—review and editing, SG, MXH, JAP, PB,  
394 SFG, LB.

395  
396 **Acknowledgements**

397  
398 We would like to thank the Farmer Family Foundation for their generous contribution,  
399 which allowed for this research to be conducted. Additionally, we would like to thank the  
400 Van Andel Institute Metabolomics and Bioenergetics Core for providing technical  
401 assistance. This project was also supported with Beaumont institutional funds as well as  
402 through the Beaumont Health Foundation with philanthropic gifts provided by the  
403 following: Sidney & Madeline Forbes, Nathan & Catherine Forbes, Edward C. Levy & the  
404 Linda Dresner Foundation, Stephen & Bobbi Polk, Warren & Carol Ann Rose & Family,  
405 Elizabeth Rose, Mickey Shapiro & Family, S. Evan & Gwen Weiner and The Hearst  
406 Foundations.

407

408

409

410 **List of abbreviations**

411 3-HK: 3-HydroxyKynurenine

412 AA: Anthranilic Acid

413 BBB: Blood Brain Barrier

414 COVID-19: Coronavirus Disease (2019)

415 CI: Confidence Interval

416 CSF: Cerebrospinal Fluid

417 Glu: Glutamate

418 ICAM-1: Intercellular Adhesion Molecule 1

419 ICU: Intensive Care Unit

420 IDO: Indoleamine 2,3-Dioxygenase

421 IFN- $\gamma$ : Interferon Gamma

422 IL: Interleukins

423 KYN: Kynurenine

424 KYNA: Kynurenic Acid

425 PA: Picolinic Acid

426 PCR: Polymerase Chain Reaction

427 ROS: Reactive Oxygen Species

428 S100B: S100- Calcium-Binding Protein B

429 SAA: Serum Amyloid A

430 SARS-CoV-2: Severe Acute Respiratory Syndrome Coronavirus 2

431 SIV: Simian Immunodeficient Virus

432 TNF- $\alpha$ : Tumor Necrosis Alpha

433 TRP: Tryptophan

434 QUIN: Quinolinic acid

435

436 **Data availability**

437 Data generated is available upon request.

438

439 **Competing interests**

440

441 P.B. has received support as a consultant from Calico Life Sciences, CureSen,  
442 Enterin Inc, Idorsia Pharmaceuticals, Lundbeck A/S, AbbVie, Fujifilm-Cellular Dynamics  
443 International, and Axial Therapeutics. He has received commercial support for research  
444 from Lundbeck A/S and F. Hoffman-La Roche. He has ownership interests in Acousort  
445 AB, Axial Therapeutics, Enterin Inc and RYNE Biotechnology. During the time that this  
446 paper was written he became an employee of F. Hoffman-La Roche, although none of  
447 the data were generated by this company.

448

449

450

451

452

453

454

455

456

## 457 **References**

- 458
- 459 1. Mao L, Jin H, Wang M, Hu Y, Chen S, He Q, et al. Neurologic Manifestations of  
460 Hospitalized Patients With Coronavirus Disease 2019 in Wuhan, China. *JAMA Neurol.*  
461 2020;77(6):683-90. doi: 10.1001/jamaneurol.2020.1127. PubMed PMID: 32275288; PubMed  
462 Central PMCID: PMC7149362.
- 463 2. Anka AU, Tahir MI, Abubakar SD, Alsabbagh M, Zian Z, Hamedifar H, et al. Coronavirus  
464 disease 2019 (COVID-19): An overview of the immunopathology, serological diagnosis and  
465 management. *Scand J Immunol.* 2021;93(4):e12998. Epub 20201203. doi: 10.1111/sji.12998.  
466 PubMed PMID: 33190302; PubMed Central PMCID: PMC7744910.
- 467 3. Roy D, Ghosh R, Dubey S, Dubey MJ, Benito-León J, Kanti Ray B. Neurological and  
468 Neuropsychiatric Impacts of COVID-19 Pandemic. *Can J Neurol Sci.* 2021;48(1):9-24. Epub  
469 20200805. doi: 10.1017/cjn.2020.173. PubMed PMID: 32753076; PubMed Central PMCID:  
470 PMC7533477.
- 471 4. Al-Aly Z, Bowe B, Xie Y. Long COVID after breakthrough SARS-CoV-2 infection. *Nat*  
472 *Med.* 2022. Epub 20220525. doi: 10.1038/s41591-022-01840-0. PubMed PMID: 35614233.
- 473 5. Schwarcz R, Bruno JP, Muchowski PJ, Wu HQ. Kynurenes in the mammalian brain:  
474 when physiology meets pathology. *Nat Rev Neurosci.* 2012;13(7):465-77. doi: 10.1038/nrn3257.  
475 PubMed PMID: 22678511; PubMed Central PMCID: PMC3681811.
- 476 6. Lugo-Huitrón R, Blanco-Ayala T, Ugalde-Muñiz P, Carrillo-Mora P, Pedraza-Chaverri J,  
477 Silva-Adaya D, et al. On the antioxidant properties of kynurenic acid: free radical scavenging  
478 activity and inhibition of oxidative stress. *Neurotoxicol Teratol.* 2011;33(5):538-47. Epub  
479 20110713. doi: 10.1016/j.ntt.2011.07.002. PubMed PMID: 21763768.
- 480 7. Hilmas C, Pereira EF, Alkondon M, Rassoulpour A, Schwarcz R, Albuquerque EX. The  
481 brain metabolite kynurenic acid inhibits alpha7 nicotinic receptor activity and increases non-  
482 alpha7 nicotinic receptor expression: physiopathological implications. *J Neurosci.*  
483 2001;21(19):7463-73. doi: 10.1523/jneurosci.21-19-07463.2001. PubMed PMID: 11567036;  
484 PubMed Central PMCID: PMC6762893.
- 485 8. Stone TW. Neuropharmacology of quinolinic and kynurenic acids. *Pharmacol Rev.*  
486 1993;45(3):309-79. PubMed PMID: 8248282.
- 487 9. Wang Q, Liu D, Song P, Zou MH. Tryptophan-kynurenine pathway is dysregulated in  
488 inflammation, and immune activation. *Front Biosci (Landmark Ed).* 2015;20(7):1116-43. Epub  
489 20150601. doi: 10.2741/4363. PubMed PMID: 25961549; PubMed Central PMCID:  
490 PMC4911177.
- 491 10. Ishii T, Iwahashi H, Sugata R, Kido R. Formation of hydroxanthommatin-derived radical  
492 in the oxidation of 3-hydroxykynurenine. *Arch Biochem Biophys.* 1992;294(2):616-22. doi:  
493 10.1016/0003-9861(92)90733-d. PubMed PMID: 1314547.
- 494 11. Wang Q, Zhang M, Ding Y, Wang Q, Zhang W, Song P, et al. Activation of NAD(P)H  
495 oxidase by tryptophan-derived 3-hydroxykynurenine accelerates endothelial apoptosis and  
496 dysfunction in vivo. *Circ Res.* 2014;114(3):480-92. Epub 20131126. doi:  
497 10.1161/circresaha.114.302113. PubMed PMID: 24281189; PubMed Central PMCID:  
498 PMC4104160.
- 499 12. Skorobogatov K, De Picker L, Verkerk R, Coppens V, Leboyer M, Müller N, et al. Brain  
500 Versus Blood: A Systematic Review on the Concordance Between Peripheral and Central  
501 Kynurenine Pathway Measures in Psychiatric Disorders. *Front Immunol.* 2021;12:716980. Epub

- 502 20210923. doi: 10.3389/fimmu.2021.716980. PubMed PMID: 34630391; PubMed Central  
503 PMCID: PMC8495160.
- 504 13. Guillemin GJ, Kerr SJ, Smythe GA, Smith DG, Kapoor V, Armati PJ, et al. Kynurenine  
505 pathway metabolism in human astrocytes: a paradox for neuronal protection. *J Neurochem*.  
506 2001;78(4):842-53. doi: 10.1046/j.1471-4159.2001.00498.x. PubMed PMID: 11520905.
- 507 14. Agudelo LZ, Femenía T, Orhan F, Porsmyr-Palmertz M, Goiny M, Martinez-Redondo V,  
508 et al. Skeletal muscle PGC-1 $\alpha$  modulates kynurenine metabolism and mediates resilience to  
509 stress-induced depression. *Cell*. 2014;159(1):33-45. doi: 10.1016/j.cell.2014.07.051. PubMed  
510 PMID: 25259918.
- 511 15. Oxenkrug G, Summergrad P. Peripheral kynurenines as biomarkers and targets for  
512 prevention and treatment of psychiatric conditions associated with SARS-CoV-2 infection.  
513 *Personalized Medicine in Psychiatry*. 2021;29-30:100088. doi:  
514 <https://doi.org/10.1016/j.pmip.2021.100088>.
- 515 16. Lembas A, Zawartko K, Sapuła M, Mięka T, Kozłowska J, Wiercińska-Drapała A.  
516 VCAM-1 as a Biomarker of Endothelial Function among HIV-Infected Patients Receiving and  
517 Not Receiving Antiretroviral Therapy. *Viruses*. 2022;14(3). Epub 20220311. doi:  
518 10.3390/v14030578. PubMed PMID: 35336985; PubMed Central PMCID: PMC8955345.
- 519 17. Chen YH, Lightman S, Eskandarpour M, Calder VL. Adhesion Molecule Targeted Therapy  
520 for Non-Infectious Uveitis. *Int J Mol Sci*. 2022;23(1). Epub 20220103. doi:  
521 10.3390/ijms23010503. PubMed PMID: 35008929; PubMed Central PMCID: PMC8745221.
- 522 18. Kang L, Kim M, Lee YM. Expression of ICAM-1 in Blood Vascular Endothelium and  
523 Tissues in Human Premalignant Lesion and Gastric/Hepatocellular Carcinomas. *Korean J*  
524 *Gastroenterol*. 2022;79(4):170-6. doi: 10.4166/kjg.2022.008. PubMed PMID: 35473775.
- 525 19. Bui TM, Wiesolek HL, Sumagin R. ICAM-1: A master regulator of cellular responses in  
526 inflammation, injury resolution, and tumorigenesis. *J Leukoc Biol*. 2020;108(3):787-99. Epub  
527 20200317. doi: 10.1002/jlb.2mr0220-549r. PubMed PMID: 32182390; PubMed Central PMCID:  
528 PMC7977775.
- 529 20. Hyun YM, Lefort CT, Kim M. Leukocyte integrins and their ligand interactions. *Immunol*  
530 *Res*. 2009;45(2-3):195-208. Epub 20090129. doi: 10.1007/s12026-009-8101-1. PubMed PMID:  
531 19184539; PubMed Central PMCID: PMC2990789.
- 532 21. Ramos TN, Bullard DC, Barnum SR. ICAM-1: isoforms and phenotypes. *J Immunol*.  
533 2014;192(10):4469-74. doi: 10.4049/jimmunol.1400135. PubMed PMID: 24795464; PubMed  
534 Central PMCID: PMC4015451.
- 535 22. Bohnacker S, Hartung F, Henkel F, Quaranta A, Kolmert J, Priller A, et al. Correction to:  
536 Mild COVID-19 imprints a long-term inflammatory eicosanoid- and chemokine memory in  
537 monocyte-derived macrophages. *Mucosal Immunol*. 2022;1. Epub 20220513. doi:  
538 10.1038/s41385-022-00526-7. PubMed PMID: 35562559; PubMed Central PMCID:  
539 PMC9098895.
- 540 23. Cihan M, Doğan Ö, Ceran Serdar C, Altunçekiç Yıldırım A, Kurt C, Serdar MA.  
541 Kynurenine pathway in Coronavirus disease (COVID-19): Potential role in prognosis. *J Clin Lab*  
542 *Anal*. 2022;36(3):e24257. Epub 20220129. doi: 10.1002/jcla.24257. PubMed PMID: 35092710;  
543 PubMed Central PMCID: PMC8906035.
- 544 24. Holtze M, Asp L, Schwieler L, Engberg G, Karlsson H. Induction of the kynurenine  
545 pathway by neurotropic influenza A virus infection. *J Neurosci Res*. 2008;86(16):3674-83. doi:  
546 10.1002/jnr.21799. PubMed PMID: 18655201.

- 547 25. Wickström R, Fowler Å, Goiny M, Millischer V, Ygberg S, Schwieler L. The Kynurenine  
548 Pathway is Differentially Activated in Children with Lyme Disease and Tick-Borne Encephalitis.  
549 *Microorganisms*. 2021;9(2). Epub 20210204. doi: 10.3390/microorganisms9020322. PubMed  
550 PMID: 33557172; PubMed Central PMCID: PMC7913947.
- 551 26. Drewes JL, Meulendyke KA, Liao Z, Witwer KW, Gama L, Ubaida-Mohien C, et al.  
552 Quinolinic acid/tryptophan ratios predict neurological disease in SIV-infected macaques and  
553 remain elevated in the brain under cART. *J Neurovirol*. 2015;21(4):449-63. Epub 20150317. doi:  
554 10.1007/s13365-015-0334-2. PubMed PMID: 25776527; PubMed Central PMCID:  
555 PMC4512924.
- 556 27. Tong M, Jiang Y, Xia D, Xiong Y, Zheng Q, Chen F, et al. Elevated Expression of Serum  
557 Endothelial Cell Adhesion Molecules in COVID-19 Patients. *J Infect Dis*. 2020;222(6):894-8. doi:  
558 10.1093/infdis/jiaa349. PubMed PMID: 32582936; PubMed Central PMCID: PMC7337874.
- 559 28. Kiluk M, Lewkowicz J, Pawlak D, Tankiewicz-Kwedlo A. Crosstalk between Tryptophan  
560 Metabolism via Kynurenine Pathway and Carbohydrate Metabolism in the Context of Cardio-  
561 Metabolic Risk-Review. *J Clin Med*. 2021;10(11). Epub 20210604. doi: 10.3390/jcm10112484.  
562 PubMed PMID: 34199713; PubMed Central PMCID: PMC8199979.
- 563 29. Lionetto L, Ulivieri M, Capi M, De Bernardini D, Fazio F, Petrucca A, et al. Increased  
564 kynurenine-to-tryptophan ratio in the serum of patients infected with SARS-CoV2: An  
565 observational cohort study. *Biochim Biophys Acta Mol Basis Dis*. 2021;1867(3):166042. Epub  
566 20201216. doi: 10.1016/j.bbadis.2020.166042. PubMed PMID: 33338598; PubMed Central  
567 PMCID: PMC7834629.
- 568 30. Badawy AA-B, Guillemin G. The Plasma [Kynurenine]/[Tryptophan] Ratio and  
569 Indoleamine 2,3-Dioxygenase: Time for Appraisal. *International Journal of Tryptophan Research*.  
570 2019;12:1178646919868978. doi: 10.1177/1178646919868978. PubMed PMID: 31488951.
- 571 31. Badawy AA. Kynurenine Pathway of Tryptophan Metabolism: Regulatory and Functional  
572 Aspects. *Int J Tryptophan Res*. 2017;10:1178646917691938. Epub 20170315. doi:  
573 10.1177/1178646917691938. PubMed PMID: 28469468; PubMed Central PMCID:  
574 PMC5398323.
- 575 32. Sarkar SA, Wong R, Hackl SI, Moua O, Gill RG, Wiseman A, et al. Induction of  
576 indoleamine 2,3-dioxygenase by interferon-gamma in human islets. *Diabetes*. 2007;56(1):72-9.  
577 doi: 10.2337/db06-0617. PubMed PMID: 17192467.
- 578 33. Liang Y, Yu Z, Song Y, Wang T, Xiao B. Indoleamine 2,3-Dioxygenase Activation by  
579 Interferon Gamma in Vascular Endothelial Rat Cells Requires Noncanonical NF-κB Signaling.  
580 *Transplant Proc*. 2019;51(6):2141-5. Epub 20190712. doi: 10.1016/j.transproceed.2019.03.043.  
581 PubMed PMID: 31307771.
- 582 34. Ellul MA, Benjamin L, Singh B, Lant S, Michael BD, Easton A, et al. Neurological  
583 associations of COVID-19. *Lancet Neurol*. 2020;19(9):767-83. Epub 20200702. doi:  
584 10.1016/s1474-4422(20)30221-0. PubMed PMID: 32622375; PubMed Central PMCID:  
585 PMC7332267.
- 586 35. Okamoto N, Natsuyama T, Igata R, Konishi Y, Tesen H, Ikenouchi A, et al. Associations  
587 Between the Kynurenine Pathway, Proinflammatory Cytokines, and Brain-Derived Neurotrophic  
588 Factor in Hospitalized Patients With Chronic Schizophrenia: A Preliminary Study. *Front*  
589 *Psychiatry*. 2021;12:696059. Epub 20210728. doi: 10.3389/fpsy.2021.696059. PubMed PMID:  
590 34393855; PubMed Central PMCID: PMC8357143.
- 591 36. Sims MD, Maine GN, Childers KL, Podolsky RH, Voss DR, Berkiw-Scenna N, et al.  
592 Coronavirus Disease 2019 (COVID-19) Seropositivity and Asymptomatic Rates in Healthcare

593 Workers Are Associated with Job Function and Masking. Clin Infect Dis. 2021;73(Suppl 2):S154-  
594 s62. doi: 10.1093/cid/ciaa1684. PubMed PMID: 33150375; PubMed Central PMCID:  
595 PMC7665441.

596

597

598

599

600

601

602

603

604

605

606

607

608

609

610

611

612

613

614

615

616

617



618 **Table 1. Demographics of the patients included in the current study**

| <b>Mild SARS-CoV-2 Demographics</b> |                                              |                                         |
|-------------------------------------|----------------------------------------------|-----------------------------------------|
|                                     | <b>SARS-CoV-2<br/>Negative (n =<br/>106)</b> | <b>SARS-CoV-2<br/>Positive (n = 44)</b> |
| <b>Age</b><br>(Mean + SD)           | 45.65 + 13.39                                | 44.18 + 13.12                           |
| <b>Sex F (%)</b>                    | 47 (44.3%)                                   | 25 (56.8%)                              |
| <b>Race n (%)</b>                   |                                              |                                         |
| Asian                               | 8 (7.5%)                                     | 7 (15.9%)                               |
| Black/African                       | 5 (4.7%)                                     | 0 (0%)                                  |
| White/Caucasian                     | 84 (79.2%)                                   | 35 (79.5%)                              |
| Other                               | 4 (3.8%)                                     | 2 (4.5%)                                |
| No Answer                           | 5 (4.7%)                                     | 0 (0%)                                  |

619  
620 SD: Standard Deviation  
621 F: female  
622  
623  
624  
625  
626  
627  
628  
629  
630  
631  
632  
633  
634  
635  
636  
637  
638  
639  
640  
641  
642  
643  
644  
645  
646  
647  
648  
649

650 **Figures:**  
651  
652

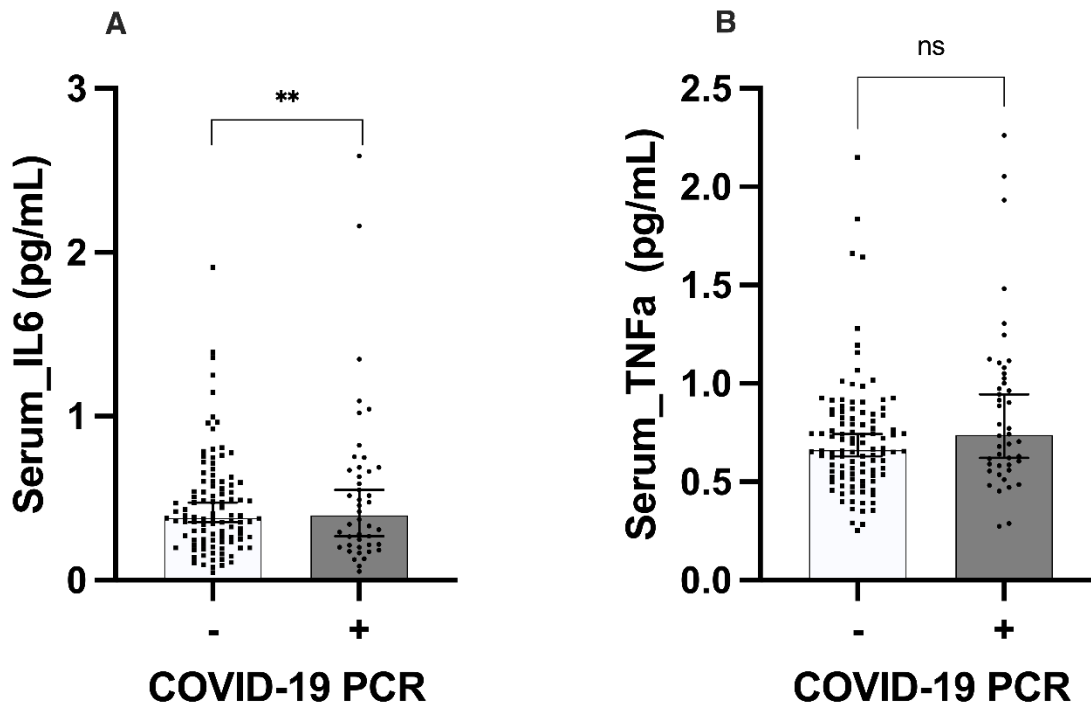

653 **Figure 1. Significantly higher levels IL-6 in patients with mild COVID-19 when**  
654 **compared to controls. a)** Significantly higher levels of IL-6 were found in patients with  
655 COVID-19 when compared to the negative controls (data adjusted for age and sex,  
656 ANOVA test F: 5.260, p=0.002 \*\*). **b)** No differences were found in the level of TNF- $\alpha$   
657 between the two groups (data adjusted for age and sex, ANOVA test F: 2.347, p= 0.075  
658 ns). Graphs are represented by median with 95% of confidence interval (CI).  
659

660  
661  
662  
663  
664  
665  
666  
667  
668  
669  
670  
671  
672  
673  
674

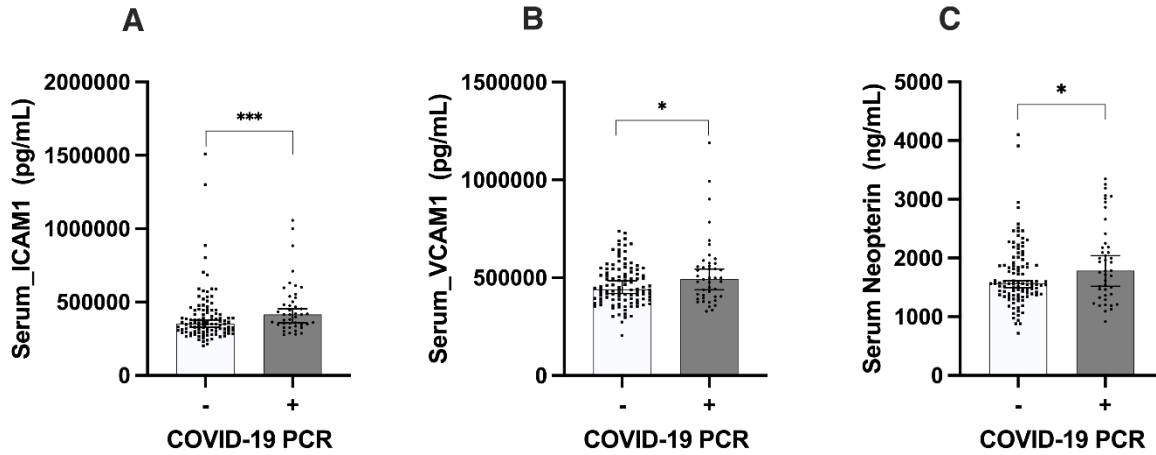

675  
676  
677  
678  
679  
680  
681  
682

**Figure 2. Significantly higher levels of serum ICAM-1, VCAM-1, and neopterin in patients with COVID-19.** When the levels of all three proteins were analyzed, patients with COVID-19 presented significantly higher levels of **a)** ICAM-1 (data adjusted for age and sex, ANOVA test F: 5.823,  $p < 0.001$  \*\*\*), **b)** VCAM-1 (data adjusted for age and sex, ANOVA test F: 3.307,  $p = 0.022$  \*), and **c)** neopterin (data adjusted for age and sex, ANOVA test F: 3.309,  $p = 0.022$  \*). Graphs are represented by median with 95% of confidence interval (CI).

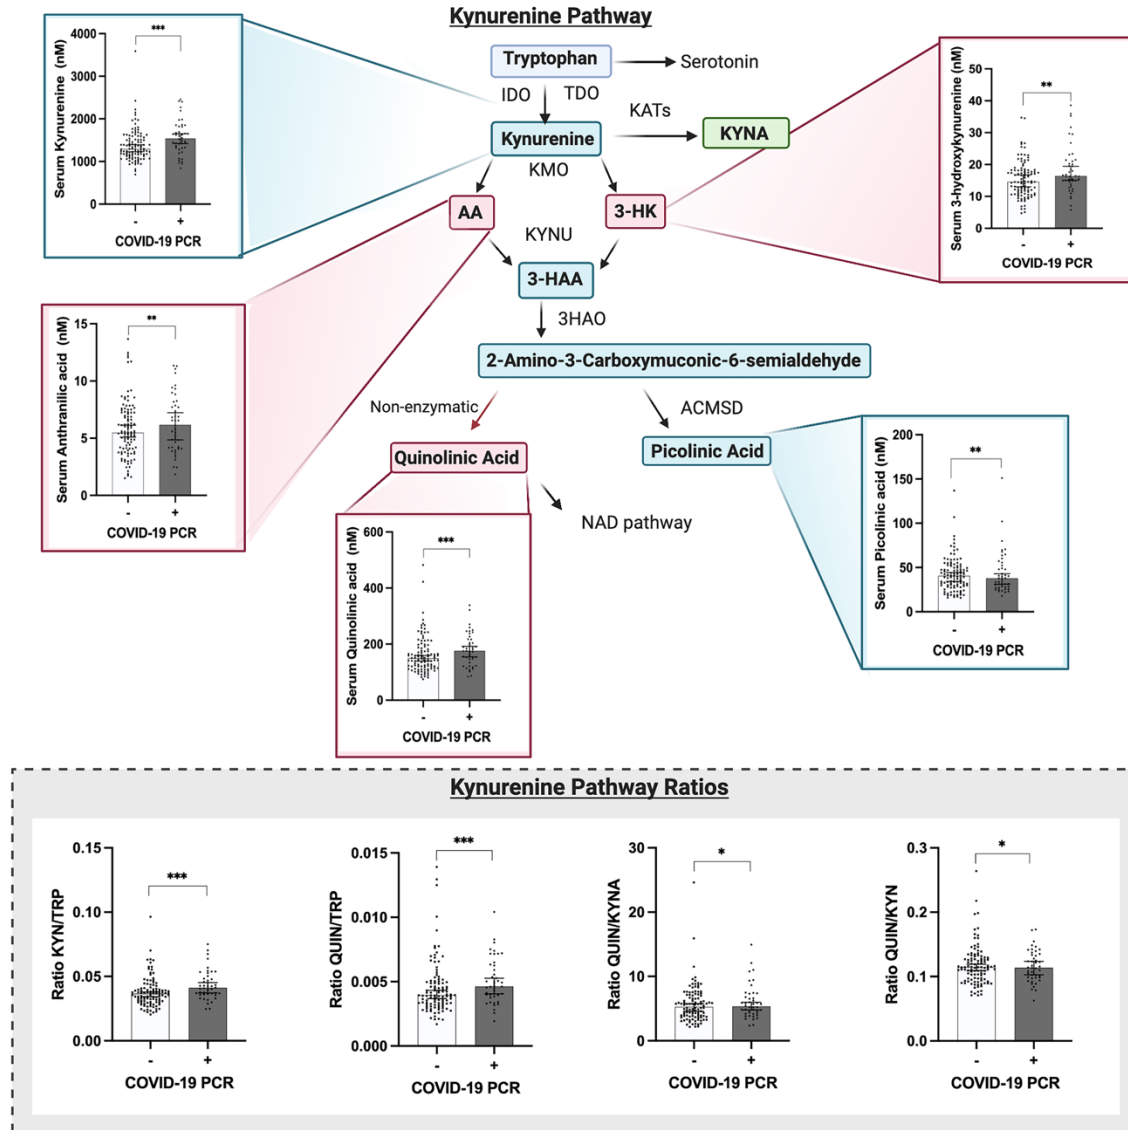

683  
 684 **Figure 3. The kynurenine pathway is altered in patients with mild COVID-19, who present**  
 685 **increased levels of neurotoxic metabolites.** Significantly increased levels of kynurenine (data  
 686 adjusted for age and sex, ANOVA test F: 11.195,  $p < 0.001$  \*\*\*), 3-hydroxykynurenine (data  
 687 adjusted for age and sex, ANOVA test F: 3.390,  $p = 0.009$  \*\*), anthranilic acid (data adjusted for  
 688 age and sex, ANOVA test F: 4.024,  $p = 0.009$  \*\*), and quinolinic acid (data adjusted for age and  
 689 sex, ANOVA test F: 8.492,  $p < 0.001$  \*\*\*) were found in patients with mild COVID-19 when  
 690 compared to controls. When the ratio of the metabolites was analyzed, significantly increased  
 691 levels of KYN/TRP (data adjusted for age and sex, ANOVA test F: 6.377,  $p < 0.001$  \*\*\*) and  
 692 QUIN/TRP (data adjusted for age and sex, ANOVA test F: 5.837,  $p < 0.001$  \*\*\*), as well as  
 693 QUIN/KYNA (data adjusted for age and sex, ANOVA test F: 2.847,  $p = 0.040$  \*) were found in  
 694 patients with COVID-19. Graphs show the median with 95% of CI. Abbreviations: IDO,  
 695 Indoleamine 2,3-dioxygenase; TDO, Tryptophan 2,3-dioxygenase; KATs, Kynurenine  
 696 aminotransferase; KYNA, kynurenic acid; KMO, Kynurenine 3-monooxygenase; AA, anthranilic  
 697 acid; 3-HK, 3-hydroxykynurenine; KYNU, Kynureninase; 3-HAA, 3-hydroxyanthranilic acid;  
 698 3HAO, 3-hydroxyanthranilate oxidase; ACMSD, Aminocarboxymuconate-semialdehyde  
 699 decarboxylase, and NAD, Nicotinamide adenine dinucleotide.

700

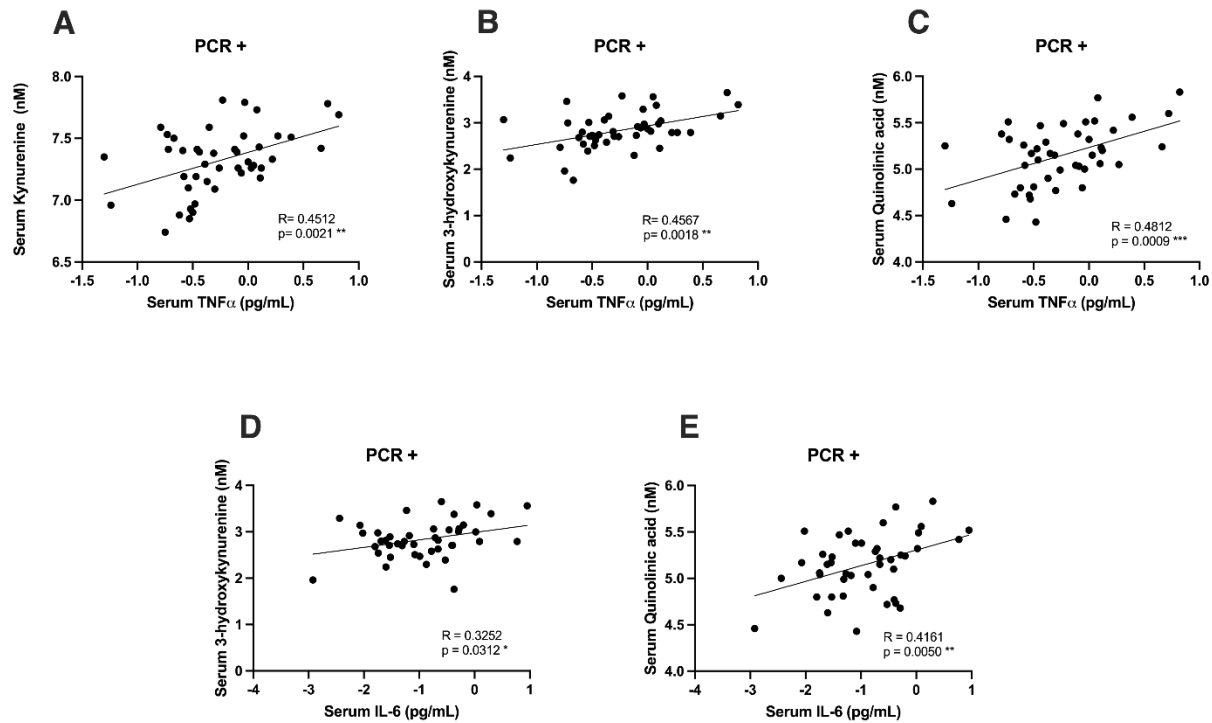

701

702

703

704

705

706

707

708

709

710

711

712

713

714

715

716

717

718

719

720

721

722

723

724

725

726

**Figure 4. There is correlation between inflammatory cytokines and metabolites of the kynurenine pathway in patients with mild COVID-19.** Patients with mild COVID-19 present a positive correlation between TNF- $\alpha$  and kynurenine (data adjusted for age and sex, Pearson R: 0.4512; p=0.0021 \*\*), TNF- $\alpha$  and 3-hydroxykynurenine (data adjusted for age and sex, Pearson R: 0.4567; p=0.0018 \*\*), TNF- $\alpha$  and quinolinic acid (data adjusted for age and sex, Pearson R: 0.4812; p=0.0009 \*\*\*), IL-6 and 3-hydroxykynurenine (data adjusted for age and sex, Pearson R: 0.3252, p=0.0312 \*) and between IL-6 and quinolinic acid (data adjusted for age and sex, Pearson R: 0.4161, p=0.0050 \*\*).

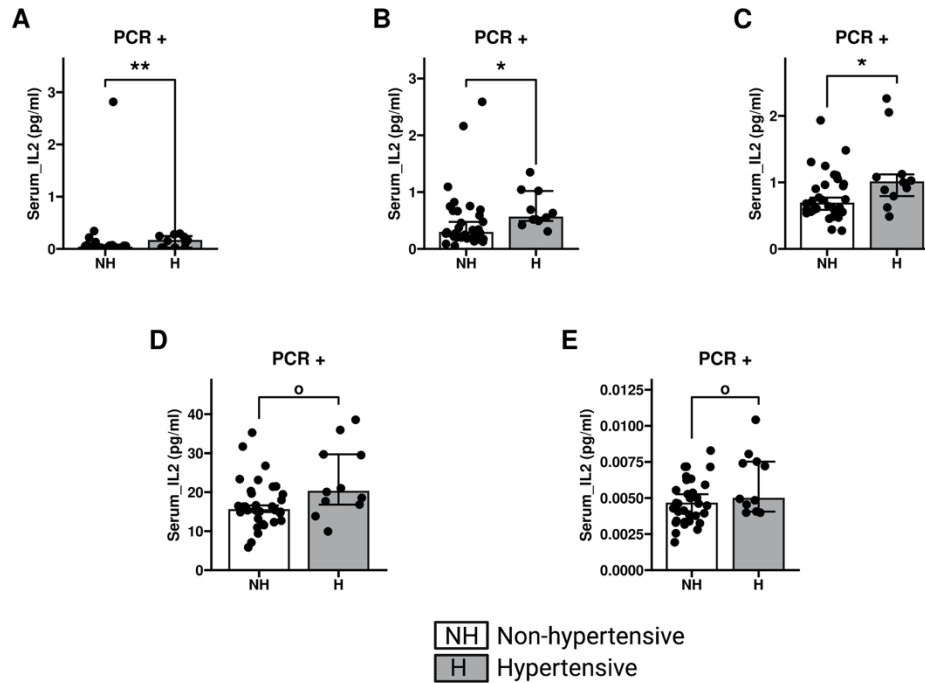

727  
728  
729  
730  
731  
732  
733  
734  
735  
736  
737  
738  
739  
740  
741

**Figure 5. Increased metabolites and ratio in COVID-19 positive hypertensive patients when compared to non-hypertensive COVID-19 patients.** Higher levels of IL-2 (fold change 2.66,  $p=0.003^{**}$ ), IL-6 (fold change 1.45,  $p\text{-value}=0.014^*$ ), and TNF- $\alpha$  (fold change 1.38,  $p=0.012^*$ ) in COVID-19 hypertensive patients when compared to COVID-19 non-hypertensive patients. Weak evidence of increased levels in 3-HK (fold change 1.26,  $p=0.08^{\circ}$ ), and the QUIN/TRP ratio (fold change 1.14,  $p = 0.089^{\circ}$ ). Graphs are represented by median with 95% of confidence interval (CI).
